# Supplementary material
Source: HighWire-hosted journal article supplement (https://oem.bmj.com/content/76/11/845)
Supplement: inline-supplementary-material-1 [file inline-supplementary-material-1.pdf]

## Supplementary materials

Table 1: Description of socioprofessional categories

|                              | Total | No surgery count (%) | Surgery count (%) |
|------------------------------|-------|----------------------|-------------------|
| JEM analysis                 | 23795 | 23697                | 98                |
| Socioprofessional categories |       |                      |                   |
| salaried employees           |       | 5845 (26.4%)         | 20 (22.2%)        |
| executives and managers      |       | 6510 (29.4%)         | 24 (26.7%)        |
| intermediate professions     |       | 7472 (33.8%)         | 30 (33.3%)        |
| manual workers               |       | 2304 (10.4%)         | 16 (17.8%)        |
| Self-reported analysis       | 81801 | 81434                | 367               |
| Socioprofessional categories |       |                      |                   |
| salaried employees           |       | 18429 (24.3%)        | 70 (21.1%)        |
| executives and managers      |       | 24127 (31.8%)        | 83 (25.0%)        |
| intermediate professions     |       | 25803 (34.0%)        | 126 (38.0%)       |
| manual workers               |       | 7489 (9.87%)         | 53 (16.0%)        |
